# Supplementary material for: Guts Bacterial Communities of Porcellio dilatatus: Symbionts Predominance, Functional Significance and Putative Biotechnological Potential
Source: MDPI journal article supplement (doi:10.3390/microorganisms10112230), 2022-11-11
Supplement: s1 [file s1]

## Supplementary tables

**Table S1.** Alpha-diversity indexes of bacterial communities present in *Porcellio dilatatus* gut samples, calculated by mothur v.1.40.2 software.

| Sample ID | Number of sequences | Coverage | Number of OTUs | Inverse simpson | Shannon | Shannon-evenness | Chao |
|-----------|---------------------|----------|----------------|-----------------|---------|------------------|------|
| PdTr1     | 17498               | 0,998    | 320            | 36,5            | 4,5     | 0,77             | 337  |
| PdTr2     | 12971               | 0,992    | 694            | 14,5            | 4,8     | 0,73             | 767  |
| PdTr3     | 34836               | 0,999    | 160            | 1,1             | 0,3     | 0,07             | 171  |
| PdTr4     | 62209               | 0,994    | 1488           | 20,9            | 4,6     | 0,63             | 1738 |
| PdTr5     | 52998               | 0,992    | 1537           | 32,9            | 4,8     | 0,66             | 1959 |
| PdTr6     | 53339               | 0,994    | 943            | 2,0             | 1,8     | 0,26             | 1310 |
| PdTr7     | 61382               | 0,994    | 1287           | 4,2             | 3,1     | 0,43             | 1561 |
| PdCP1     | 13479               | 0,995    | 557            | 39,3            | 5,1     | 0,80             | 612  |
| PdCP2     | 12068               | 0,995    | 453            | 29,0            | 4,7     | 0,77             | 495  |
| PdCP3     | 16144               | 0,993    | 679            | 7,4             | 3,9     | 0,60             | 741  |
| PdCP4     | 88484               | 0,995    | 2000           | 8,9             | 3,9     | 0,51             | 2377 |
| PdCP5     | 72436               | 0,993    | 2576           | 40,1            | 5,5     | 0,70             | 2953 |
| PdCP6     | 62496               | 0,994    | 1585           | 7,4             | 3,7     | 0,50             | 1902 |
| PdCV1     | 12879               | 0,998    | 239            | 18,0            | 3,7     | 0,68             | 262  |
| PdCV2     | 28539               | 1,000    | 87             | 10,7            | 2,8     | 0,64             | 88   |
| PdCV3     | 18477               | 0,999    | 251            | 27,6            | 4,1     | 0,75             | 265  |
| PdBT1     | 19147               | 0,997    | 625            | 21,6            | 4,7     | 0,73             | 673  |
| PdBT2     | 16746               | 0,993    | 389            | 14,3            | 3,4     | 0,57             | 480  |
| PdBT3     | 19294               | 0,981    | 1868           | 76,9            | 6,2     | 0,82             | 2062 |
| PdBT4     | 13355               | 0,991    | 625            | 26,4            | 4,5     | 0,69             | 702  |
| PdBT5     | 65918               | 0,995    | 3148           | 212,5           | 6,7     | 0,83             | 3326 |
| PdBT6     | 73256               | 0,994    | 2086           | 37,7            | 5,0     | 0,66             | 2400 |
